# Supplementary material
Source: PubMed Central journal article supplement (PMC2657378)
Supplement: 0809504106_0809504106SI.pdf [file 0809504106_0809504106SI.pdf]

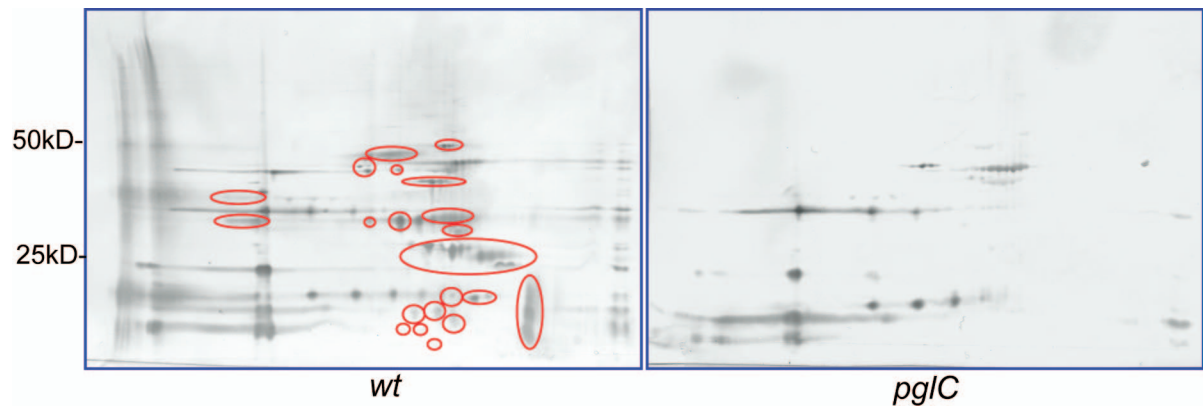

**Fig. S2.** Identification of potential glycoproteins in detergent extracts from wild-type and *pglC* backgrounds using 2D gel electrophoresis and immunoblotting. Signals unique to the wild-type background are circled in red and were used as a template to guide excision of equivalent protein spots from 2D gels run in parallel.

```

NGO1717      MKSRHLALALGVAALFALAACDSKVQTSVPADSAPAASAAAAPAGLVEGQNYTVLANPIP
NGO1548      MKFKHLLPLLLSAVLS-----AQAYALTEGEDYLVLDKPIP
              ** :** * *.*
                                * .*.**::* ** :***

NGO1717      QQQAGKVEVLEFFGYFCPHCARLEPVLSKHAKSFKDDMYLRTEHVWQKEMLPLARLAAA
NGO1548      QEQPGKIEVLEFFGYFCVHCHHFDPLLLKLGKALPSDTYLRTEHVWVRPEMLGLARMAAA
              *:*.*:**:***** ** :::*:* * .*:: .* *****: *** **:*

NGO1717      VDMAAAESKDVANSHIFDAMVNQIKLQEPEVLKKWLGEQTAFDGKKVLAAYESPESQAR
NGO1548      VKLSGLKYQ--ANSAVFKAVYEQKIRLENRAVAGKWALSQKGF DGKKLMRAYDSPEAAAV
              *.:. : : *** :*.* :***:*: * ** .*.*****: **:***: *

NGO1717      AGKMQELTETFQIDGTPTVIVGGKYKVEFAD-WESGMNTIDLLADKVREEQKAAQ
NGO1548      ALKMQLTEQYGIDSTPTVIIVGGKYRVI FNNGFDGGVHTIKELVAKVREERKRQTPAVQK
              * ***:* ** :*.*****:* * : :.*:**. *. *****:*

```

CLUSTAL W (1.83) multiple sequence alignment

**Fig. S3.** Sequence alignment of Ng1717 and Ng1548 DsbA paralogues. The Ng1717 ASP-rich LCR and associated glycopeptide 27-TSVPADSAPAASAA-40 (green) have no counterparts in Ng1548. The mature N-terminal Cys residue of Ng1717 is shown in red.

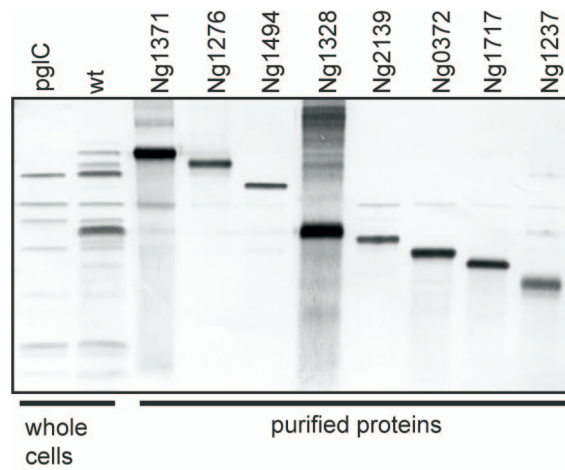

**Fig. S4.** Identification of glycoproteins detected in immunoblots of whole-cell lysates (in a *pilE* background) by comparison with the migration of purified glycoproteins. Ng0994, Ng1043, and Ng1225 were not included here.

**Table S1. LCRs found in glycoproteins for which glycopeptides have yet to be identified.**

| Protein | LCR sequence                                      |
|---------|---------------------------------------------------|
| Ng0372  | 19-CGGSEGGSGASSAPAQSAISGS-40                      |
| Ng0994  | 18-CSQEPAAPAAEATPAGEAPASEAPAAEAPADAAEAPAAGNCAA-61 |
| Ng1494  | 29-AGSAPAANAEEAAA-41                              |
| Ng1225  | 25-EAAPASASEPAAASAA-40                            |

For Ng 0372 and Ng0994, LCR sequences are shown starting at the lipoprotein cleavage site Cys only.

Table S2. Strains

| Strain name    | Parental strain | Relevant genotype             | Reference  |
|----------------|-----------------|-------------------------------|------------|
| N400           | VD300           | <i>recA6*</i>                 | (1)        |
| KS104/GGC      | N400            | <i>pglC::kan</i>              | (2)        |
| N400 pilE S63A | N400            | <i>pilE(S63A)</i>             | (2)        |
| 4/3/1          | VD300           | <i>pilE<sub>ind</sub></i>     | (3)        |
| KS105          | 4/3/1           | <i>pglC::kan</i>              | This study |
| KS127          | 4/3/1           | <i>pglE<sub>on</sub></i>      | This study |
| KS123          | 4/3/1           | <i>pglO::kan</i>              | This study |
| KS122          | 4/3/1           | <i>pglA::kan</i>              | This study |
| KS153          | 4/3/1           | <i>pglF::kan</i>              | This study |
| KS154          | 4/3/1           | <i>pglD::kan</i>              | This study |
| KS102          | 4/3/1           | <i>NG1371-6xHis</i>           | This study |
| KS103          | 4/3/1           | <i>pglC::kan NG1371-6xHis</i> | This study |
| KS109          | 4/3/1           | <i>NG0372-6xHis</i>           | This study |
| KS108          | 4/3/1           | <i>pglC::kan NG0372-6xHis</i> | This study |
| KS110          | 4/3/1           | <i>NG1237-6xHis</i>           | This study |
| KS111          | 4/3/1           | <i>pglC::kan NG1237-6xHis</i> | This study |
| KS112          | 4/3/1           | <i>NG1328-6xHis</i>           | This study |
| KS113          | 4/3/1           | <i>pglC::kan NG1328-6xHis</i> | This study |
| KS120          | 4/3/1           | <i>pglA::kan NG1328-6xHis</i> | This study |
| KS121          | 4/3/1           | <i>pglO::kan NG1328-6xHis</i> | This study |
| KS128          | 4/3/1           | <i>pglF::kan NG1328-6xHis</i> | This study |
| KS138          | 4/3/1           | <i>NG1276-6xHis</i>           | This study |
| KS139          | 4/3/1           | <i>pglC::kan NG1276-6xHis</i> | This study |
| KS152          | 4/3/1           | <i>NG2139-6xHis</i>           | This study |
| KS132          | 4/3/1           | <i>pglC::kan NG2139-6xHis</i> | This study |
| KS133          | 4/3/1           | <i>NG1548-6xHis</i>           | This study |
| KS134          | 4/3/1           | <i>NG1494-6xHis</i>           | This study |
| KS135          | 4/3/1           | <i>pglC::kan NG1494-6xHis</i> | This study |
| KS136          | 4/3/1           | <i>NG1717-6xHis</i>           | This study |
| KS137          | 4/3/1           | <i>pglC::kan NG1717-6xHis</i> | This study |
| KS155          | 4/3/1           | <i>NG1043-6xHis</i>           | This study |
| KS156          | 4/3/1           | <i>pglC::kan NG1043-6xHis</i> | This study |
| KS157          | 4/3/1           | <i>NG0994-6xHis</i>           | This study |
| KS158          | 4/3/1           | <i>pglC::kan NG0994-6xHis</i> | This study |
| KS159          | 4/3/1           | <i>NG1225-6xHis</i>           | This study |
| KS160          | 4/3/1           | <i>pglC::kan NG1225-6xHis</i> | This study |

\**recA6* is an IPTG-inducible allele of *recA*.

1. Tonjum T, Freitag NE, Namork E, Koomey M (1995) Identification and characterization of *pilG*, a highly conserved pilus-assembly gene in pathogenic *Neisseria*. *Mol Microbiol* 16:451–464.
2. Hegge FT, et al. (2004) Unique modifications with phosphocholine and phosphoethanolamine define alternate antigenic forms of *Neisseria gonorrhoeae* type IV pili. *Proc Natl Acad Sci USA* 101:10798–10803.
3. Wolfgang M, van Putten JP, Hayes SF, Dorward D, Koomey M (2000) Components and dynamics of fiber formation define a ubiquitous biogenesis pathway for bacterial pili. *EMBO J* 19:6408–6418.
4. Aas FE, Vik A, Vedde J, Koomey M, Egge-Jacobsen W (2007) *Neisseria gonorrhoeae* O-linked pilin glycosylation: Functional analyses define both the biosynthetic pathway and glycan structure. *Mol Microbiol* 65:607–624.
